# Supplementary material
Source: Springer Nature journal article supplement (https://www.springerprofessional.de/resource/supplementary/40327_2013_5_MOESM9_ESM.pdf/10801436)

Parking Garage

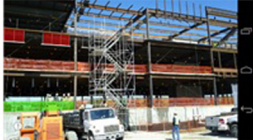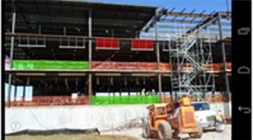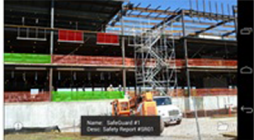

Name: SafeGuard #1  
Desc: Safety Report #1902

Center for the Arts

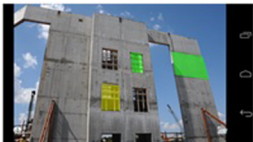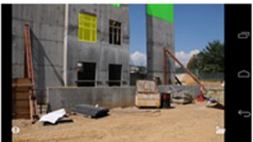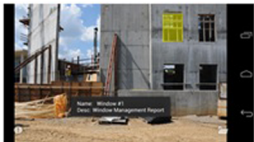

Name: Window #1  
Desc: Window Management Report

Norris Hall

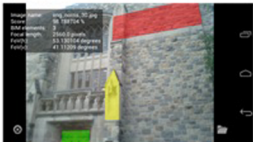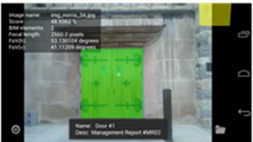

Name: Door #1  
Desc: Management Report #1902

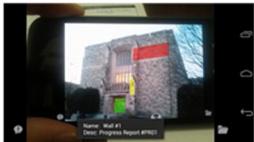

Name: Wall #1  
Desc: Progress Report #1902

Patton Hall

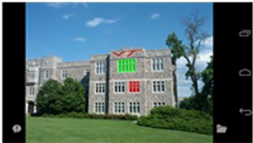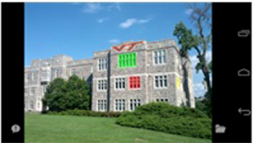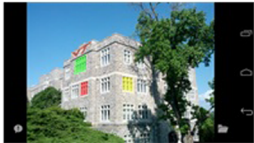

Supplement: MOESM9 [file 10801436]
